# Supplementary material for: C-Reactive Protein Is Independently Associated With Glucose but Not With Insulin Resistance in Healthy Men
Source: Oxford University Press journal article supplement (doi:10.2337/dc06-2531), 2007-05-25
Supplement: dc062531-sup-dc2531onlineappendixtable.doc [file dc062531-sup-dc2531onlineappendixtable.doc]

**Online Appendix Table 1. Baseline characteristics in different quartiles of C-Reactive Protein (CRP) of the study population (N=364)**

| *Characteristics* | Quartiles of CRP * | | | |
| --- | --- | --- | --- | --- |
|  | 1 | 2 | 3 | 4 |
|  | mean ±SD | mean ±SD | mean ±SD | mean ±SD |
| CRP (mg/l) | 0.4 ±0.1 | 0.9 ±0.2 | 1.8 ±0.3 | 5.0 ±2.1 |
| Age (yr) | 54.5 ±11.6 | 61.7 ±10.4 | 61.1 ±11.0 | 62.9 ±10.3 |
| Weight (kg) | 79.5 ±11.9 | 83.4 ±11.7 | 85.1 ±10.5 | 84.4 ±11.2 |
| Waist circumference (cm) | 93.7 ±9.1 | 99.2 ±8.2 | 100.2 ±8.4 | 101.4 ±8.5 |
| Waist-to-hip ratio | 0.94 ±0.06 | 0.98 ±0.05 | 0.98 ±0.06 | 0.99 ±0.06 |
| BMI (kg/m2) | 24.9 ±3.3 | 26.1 ±2.7 | 27.0 ±3.2 | 26.9 ±3.4 |
| Visceral fat (cm) | 6.4 ±1.8 | 7.2 ±1.8 | 7.8 ±2.2 | 8.3 ±2.1 |
| Subcutaneous fat (cm) | 2.4 ±0.8 | 2.8 ±0.9 | 2.8 ±0.7 | 2.6 ±0.8 |
| Total body fat mass (%) | 18.4 ±4.2 | 20.8 ±3.5 | 20.6 ±3.6 | 22.4 ±4.1 |
| Alcohol (units/week) | 12.5 ±11.9 | 14.8 ±16.9 | 12.1 ±10.6 | 13.2 ±13.5 |
| Physical activity (Voorrips score) | 20.2 ±7.1 | 18.4 ±7.3 | 18.3 ±7.9 | 16.3 ±7.2 |
| Systolic blood pressure (mmHg) | 138.7 ±21.8 | 144.3 ±17.7 | 142.5 ±20.8 | 145.4 ±24.0 |
| Diastolic blood pressure (mmHg) | 79.1 ±10.0 | 82.4 ±10.4 | 82.3 ±9.4 | 82.5 ±10.9 |
| Cholesterol, total (mmol/l) | 5.8 ±1.0 | 5.8 ±1.1 | 5.9 ±0.8 | 5.9 ±1.1 |
| Cholesterol, HDL (mmol/l) | 1.4 ±0.4 | 1.3 ±0.3 | 1.3 ±0.3 | 1.3 ±0.4 |
| Triglycerides (mmol/l) | 1.5 ±1.8 | 1.6 ±1.3 | 1.6 ±1.3 | 1.8 ±1.2 |
| Glucose (mmol/l) | 5.5 ±0.6 | 5.7 ±0.7 | 5.7 ±0.8 | 6.1 ±1.5 |
| Insulin (pmol/l) | 47.2 ±20.8 | 58.3 ±37.5 | 60.4 ±32.6 | 63.9 ±34.7 |
| Insulin resistance (HOMA-IR) | 1.7 ±0.9 | 2.2 ±1.6 | 2.3 ±1.5 | 2.6 ±1.7 |
|  |  |  |  |  |
|  | 1 | 2 | 3 | 4 |
|  | N (%) | N (%) | N (%) | N (%) |
| Smoking, current | 21 (22.3) | 14 (15.4) | 18 (19.1) | 32 (37.6) |
| Cardiovascular disease | 7 (7.4) | 16 (17.6) | 13 (13.8) | 20 (23.5) |
| Metabolic syndrome | 12 (12.8) | 16 (17.6) | 18 (19.1) | 34 (40.0) |

* CRP quartile ranges are: (1) 0-0.6 mg/l, (2) 0.6-1.2 mg/l, (3) 1.2-2.6 mg/l, (4) 2.6-10 mg/l.
